# Supplementary material
Source: PubMed Central journal article supplement (PMC1366558)

Fig. S1(A-C) F-CARS images of myelin figures formed of DOPC, DPPC, or DPPC / cholesterol (40% in weight). was tuned to  $2840\text{ cm}^{-1}$ . Bar =  $10\ \mu\text{m}$ . (D) The average values of  $I_{\parallel} / I_{\perp}$  are 1.48, 4.44, 6.21 for DOPC, DPPC/cholesterol, and DPPC myelin figures, respectively.  $I_{\parallel}$  and  $I_{\perp}$  are CARS intensities from different parts of the myelin tip where the bilayer plane is parallel with and perpendicular to the excitation polarization, respectively.

(A) DOPC ( $L_d$ )

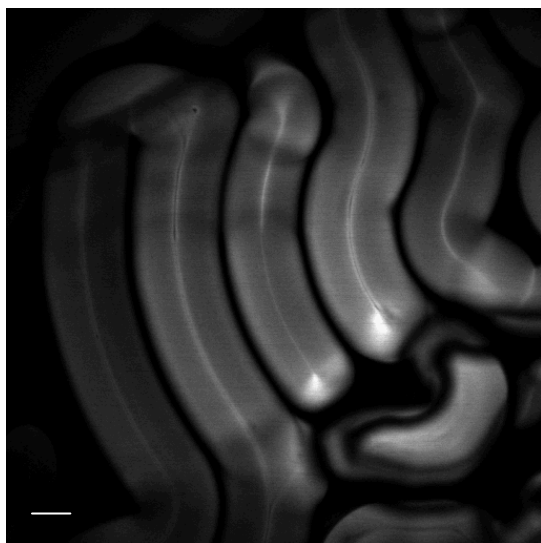

(B) DPPC ( $S_o$ )

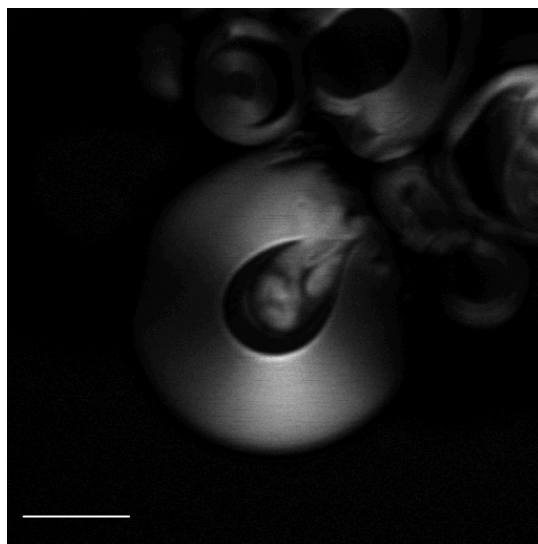

(C) DPPC+40%chol ( $L_o$ )

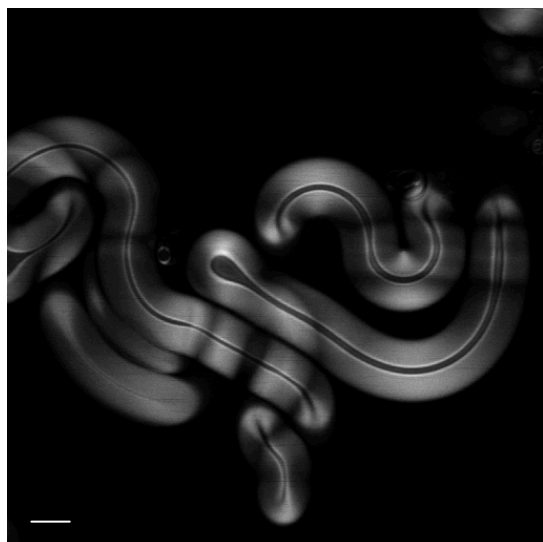

(D)

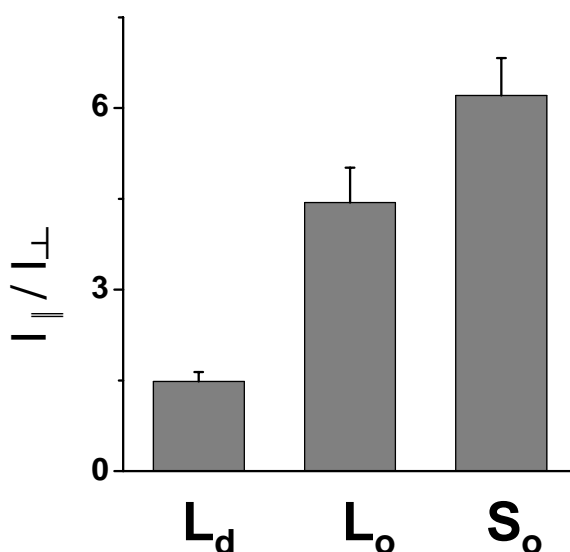

Supplement: biophysj_105.061911_1.pdf [file biophysj_105.061911_1.pdf]
